# Supplementary material for: The Involvement of CXCL17-GPR35 in Gastric Cancer Initiation and Development
Source: Research Square preprint supplement (doi:10.21203/rs.3.rs-1029803/v1), 2021-11-02
Supplement: Supplementary file 1 [file 3638d894e4eacb6192c23353.docx]

| Table S1. Clinicopathological parameters and survival in GC | | | | | | | | |
| --- | --- | --- | --- | --- | --- | --- | --- | --- |
| Characteristics | CXCL17 group | | | |  | GPR35 group | | | | |
| GC | Cases of events | MST (months) | *P* value |  | GC | Cases of events | MST (months) | | *P* value |
| Total | 111 | 52 | 44 |  |  | 103 | 49 | 42 | |  |
| Gender |  |  |  |  |  |  |  |  | |  |
| Male | 87 | 41 | 44 |  |  | 79 | 37 | 44 | |  |
| Female | 24 | 11 | 30 | 0.919 |  | 24 | 12 | 30 | | 0.602 |
| Age(years) |  |  |  |  |  |  |  |  | |  |
| >60 | 58 | 28 | 36 |  |  | 52 | 26 | 36 | |  |
| <=60 | 53 | 24 | 44 | 0.696 |  | 51 | 23 | 42 | | 0.443 |
| H.pylori infection1 |  |  |  |  |  |  |  |  | |  |
| Positive | 62 | 30 | 42 |  |  | 57 | 28 | 42 | |  |
| Negative | 27 | 11 | Not reached | 0.741 |  | 26 | 12 | 42 | | 0.994 |
| Tumor location |  |  |  |  |  |  |  |  | |  |
| Body only | 17 | 10 | 30 |  |  | 16 | 9 | 30 | |  |
| Antrum only | 53 | 23 | 39 |  |  | 51 | 23 | 39 | |  |
| Others | 41 | 19 | 49 | 0.587 |  | 36 | 17 | 42 | | 0.860 |
| Histological type |  |  |  |  |  |  |  |  | |  |
| Adenocarcinoma | 87 | 40 | 48 |  |  | 78 | 35 | 48 | |  |
| Absolute signet ring cell carcinoma | 5 | 3 | 30 |  |  | 6 | 4 | 30 | |  |
| Mixed carcinoma | 18 | 9 | 39 |  |  | 18 | 10 | 39 | |  |
| Lymphoepithelioma-Like Carcinoma | 1 | 0 | Not reached | 0.702 |  | 1 | 0 | Not reached | | 0.501 |
| Stage |  |  |  |  |  |  |  |  | |  |
| Early | 5 | 0 | Not reached |  |  | 6 | 1 | 42 | |  |
| Advanced | 106 | 52 | 42 | 0.177 |  | 97 | 48 | 39 | | 0.297 |
| Invasive extent |  |  |  |  |  |  |  |  | |  |
| T1 | 6 | 0 | Not reached |  |  | 7 | 1 | Not reached | |  |
| T2 | 16 | 1 | Not reached |  |  | 12 | 0 | Not reached | |  |
| T3 | 15 | 3 | Not reached |  |  | 14 | 3 | Not reached | |  |
| T4 | 74 | 48 | 28 | **0.000** |  | 69 | 45 | 24 | | **0.000** |
| TNM stage1 |  |  |  |  |  |  |  |  | |  |
| I | 21 | 8 | 53 |  |  | 20 | 8 | 42 | |  |
| II | 26 | 6 | Not reached |  |  | 24 | 4 | Not reached | |  |
| III | 62 | 38 | 30 |  |  | 57 | 37 | 25 | |  |
| IV | 1 | 0 | Not reached | **0.012** |  | 1 | 0 |  | | **0.001** |
| Lymph node metastasis1 |  |  |  |  |  |  |  |  | |  |
| Positive | 79 | 48 | 30 |  |  | 72 | 44 | 28 | |  |
| Negative | 30 | 3 | Not reached | **0.000** |  | 29 | 4 | Not reached | | **0.000** |
| Perineural invasion1 |  |  |  |  |  |  |  |  | |  |
| Positive | 93 | 50 | 31 |  |  | 89 | 48 | 36 | |  |
| Negative | 16 | 2 | Not reached | **0.003** |  | 11 | 0 | Not reached | | **0.004** |
| Vessel carcinoma embolus |  |  |  |  |  |  |  |  | |  |
| Positive | 70 | 37 | 31 |  |  | 65 | 35 | 31 | |  |
| Negative | 41 | 15 | 53 | **0.047** |  | 38 | 14 | Not reached | | **0.040** |
| Growth pattern |  |  |  |  |  |  |  |  | |  |
| superficial spreading | 2 | 0 | Not reached |  |  | 3 | 1 | 42 | |  |
| Infiltrative | 93 | 46 | 39 |  |  | 86 | 43 | 39 | |  |
| Nested/cloddy | 16 | 6 | Not reached | 0.249 |  | 14 | 5 | Not reached | | 0.330 |
| Maximum diameter(cm)1 |  |  |  |  |  |  |  |  | |  |
| >4.5 | 72 | 42 | 36 |  |  | 69 | 42 | 31 | |  |
| <=4.5 | 38 | 9 | Not reached | **0.008** |  | 33 | 6 | Not reached | | **0.001** |

1 Incomplete information
